# Supplementary material for: The Association Between Smoking Tobacco After a Diagnosis of Diabetes and the Prevalence of Diabetic Nephropathy in the Korean Male Population
Source: PubMed Central journal article supplement — J Prev Med Public Health. 2016 Mar 23;49(2):108–17. doi: 10.3961/jpmph.15.062 (PMC4829370; doi:10.3961/jpmph.15.062), 2016-03-23
Supplement: jpmph-49-2-108-supple1.pdf [file jpmph-49-2-108-supple1.pdf]

**Supplemental Table 1.** The association between smoking behavior and duration, and presence of diabetic nephropathy

| Variables                           | Total | Diabetic nephropathy <sup>1</sup> | Unadjusted        | Adjusted <sup>2</sup> |
|-------------------------------------|-------|-----------------------------------|-------------------|-----------------------|
| Smoking behavior                    |       |                                   |                   |                       |
| Non-smoker                          | 90    | 23 (25.6)                         | 1.00 (reference)  | 1.00 (reference)      |
| Former smoker: smoking duration (y) |       |                                   |                   |                       |
| <20                                 | 102   | 30 (29.4)                         | 1.21 (0.64, 2.29) | 1.15 (0.58, 2.28)     |
| ≥20                                 | 205   | 74 (36.1)                         | 1.65 (0.95, 2.86) | 1.54 (0.85, 2.80)     |
| Current smoker                      | 225   | 85 (37.8)                         | 1.77 (1.03, 3.05) | 2.42 (1.33, 4.39)     |

Values are presented as number (%) or odds ratio (95% confidence interval). Total 7 subjects were further excluded in this analysis due to the lack of smoking duration.

<sup>1</sup>Diabetic nephropathy is defined as spot urine albumin/creatinine ratio ≥30 mg/g or estimated glomerular filtration rate <60 mL/min/1.73 m<sup>2</sup> according to the Modification of Diet in Renal Disease formula.

<sup>2</sup>Adjusted for age, duration of diabetes, hemoglobin A1c, body mass index, systolic blood pressure, medication for hypertension, and dyslipidemia. Dyslipidemia includes those with total cholesterol ≥200 mg/dL, or triglyceride ≥150 mg/dL, or medication for dyslipidemia.
